# Supplementary material for: Trichinella spp. in Wild Boars (Sus scrofa), Brown Bears (Ursus arctos), Eurasian Lynxes (Lynx lynx) and Badgers (Meles meles) in Estonia, 2007–2014
Source: PubMed Central journal article supplement (PMC7830479; doi:10.3390/ani11010183), 2021-01-14
Supplement: animals-11-00183-s001.pdf [file animals-11-00183-s001.pdf]

**Table 1.** Primary testing included in the study: number of wild boars (*Sus scrofa*), brown bears (*Ursus arctos*), Eurasian lynxes (*Lynx lynx*) and badgers (*Meles meles*) tested for *Trichinella* in Estonia, 2007–2014, by sex, age category, county, and by year.

|               | Total  | 2007 | 2008 | 2009 | 2010 | 2011 | 2012 | 2013 | 2014 |
|---------------|--------|------|------|------|------|------|------|------|------|
| Wild boars    |        |      |      |      |      |      |      |      |      |
| Sex           |        |      |      |      |      |      |      |      |      |
| Male          | 2631   | 4    | 0    | 1    | 8    | 8    | 88   | 1087 | 1435 |
| Female        | 1386   | 1    | 2    | 0    | 4    | 5    | 55   | 561  | 758  |
| Unknown       | 26,549 | 2417 | 2756 | 4379 | 3586 | 2700 | 3843 | 3067 | 3801 |
| Age category  |        |      |      |      |      |      |      |      |      |
| Juvenile      | 3992   | 170  | 163  | 204  | 171  | 165  | 399  | 1221 | 1499 |
| Adult         | 2057   | 63   | 64   | 102  | 92   | 73   | 140  | 634  | 889  |
| Unknown       | 24,517 | 2189 | 2531 | 4074 | 3335 | 2475 | 3447 | 2860 | 3606 |
| County        |        |      |      |      |      |      |      |      |      |
| Harjumaa      | 2554   | 125  | 165  | 178  | 134  | 98   | 495  | 565  | 794  |
| Hiiumaa       | 304    | 5    | 1    | 6    | 0    | 3    | 92   | 87   | 110  |
| Ida-Virumaa   | 473    | 22   | 44   | 22   | 45   | 35   | 99   | 80   | 126  |
| Jõgevamaa     | 1078   | 12   | 20   | 53   | 45   | 81   | 185  | 246  | 436  |
| Järvamaa      | 1038   | 26   | 22   | 37   | 22   | 25   | 200  | 308  | 398  |
| Läänemaa      | 1995   | 52   | 32   | 69   | 64   | 74   | 478  | 578  | 648  |
| Lääne-Virumaa | 2698   | 222  | 206  | 235  | 185  | 182  | 385  | 463  | 820  |
| Põlvamaa      | 1349   | 57   | 92   | 118  | 134  | 137  | 299  | 328  | 184  |
| Pärnumaa      | 1156   | 12   | 11   | 23   | 18   | 15   | 326  | 384  | 367  |
| Raplamaa      | 1237   | 50   | 44   | 68   | 35   | 30   | 242  | 291  | 477  |
| Saaremaa      | 2438   | 74   | 27   | 18   | 37   | 38   | 532  | 719  | 347  |
| Tartumaa      | 1060   | 40   | 57   | 64   | 58   | 79   | 172  | 243  | 993  |
| Valgamaa      | 256    | 9    | 8    | 20   | 10   | 19   | 41   | 94   | 55   |
| Viljandimaa   | 370    | 2    | 10   | 35   | 42   | 7    | 79   | 89   | 106  |
| Võrumaa       | 497    | 7    | 28   | 16   | 58   | 59   | 90   | 147  | 92   |
| Unknown       | 12,063 | 1707 | 1991 | 3418 | 2711 | 1831 | 271  | 93   | 41   |
| Total         | 30,566 | 2422 | 2758 | 4380 | 3598 | 2713 | 3986 | 4715 | 5994 |
| Brown bears   |        |      |      |      |      |      |      |      |      |
| Sex           |        |      |      |      |      |      |      |      |      |
| Male          | 26     | 4    | 2    | 1    | 2    | 1    | 3    | 10   | 3    |
| Female        | 14     | 0    | 0    | 2    | 2    | 1    | 1    | 7    | 1    |
| Unknown       | 389    | 42   | 48   | 48   | 60   | 62   | 70   | 25   | 34   |
| Age category  |        |      |      |      |      |      |      |      |      |
| Juvenile      | 22     | 1    | 0    | 1    | 7    | 9    | 4    | 0    | 0    |
| Adult         | 87     | 4    | 3    | 6    | 18   | 22   | 14   | 17   | 3    |

|               |     |    |    |    |    |    |    |    |    |
|---------------|-----|----|----|----|----|----|----|----|----|
| Unknown       | 320 | 41 | 50 | 51 | 64 | 64 | 74 | 42 | 38 |
| County        |     |    |    |    |    |    |    |    |    |
| Harjumaa      | 31  | 0  | 2  | 4  | 5  | 3  | 10 | 3  | 4  |
| Ida-Virumaa   | 72  | 14 | 10 | 13 | 4  | 5  | 9  | 8  | 9  |
| Jõgevamaa     | 61  | 5  | 5  | 4  | 7  | 12 | 13 | 6  | 9  |
| Järvamaa      | 37  | 2  | 3  | 4  | 3  | 8  | 8  | 6  | 3  |
| Läänemaa      | 2   | 0  | 0  | 1  | 1  | 0  | 0  | 0  | 0  |
| Lääne-Virumaa | 75  | 5  | 8  | 9  | 12 | 15 | 15 | 6  | 5  |
| Põlvamaa      | 14  | 2  | 5  | 0  | 0  | 2  | 2  | 2  | 1  |
| Pärnumaa      | 14  | 0  | 2  | 3  | 4  | 2  | 1  | 0  | 2  |
| Raplamaa      | 18  | 1  | 3  | 1  | 3  | 3  | 5  | 1  | 1  |
| Tartumaa      | 44  | 3  | 6  | 7  | 5  | 3  | 9  | 8  | 3  |
| Viljandimaa   | 7   | 0  | 2  | 1  | 1  | 0  | 1  | 1  | 1  |
| Võrumaa       | 1   |    | 1  |    |    |    |    |    |    |
| Unknown       | 53  | 14 | 3  | 4  | 19 | 11 | 1  | 1  | 0  |
| Total         | 429 | 46 | 50 | 51 | 64 | 64 | 74 | 42 | 38 |

## Lynxes

## Sex

|         |    |    |   |    |   |    |   |   |   |
|---------|----|----|---|----|---|----|---|---|---|
| Male    | 14 | 0  | 2 | 1  | 4 | 0  | 4 | 3 | 0 |
| Female  | 10 | 0  | 1 | 1  | 4 | 0  | 1 | 3 | 0 |
| Unknown | 66 | 10 | 9 | 18 | 9 | 11 | 6 | 3 | 0 |

## Age category

|          |    |   |    |    |   |   |   |   |   |
|----------|----|---|----|----|---|---|---|---|---|
| Juvenile | 15 | 0 | 1  | 1  | 5 | 2 | 3 | 3 | 0 |
| Adult    | 17 | 1 | 1  | 2  | 5 | 2 | 3 | 3 | 0 |
| Unknown  | 58 | 9 | 10 | 17 | 7 | 7 | 5 | 3 | 0 |

## County

|               |    |    |    |    |    |    |    |   |   |
|---------------|----|----|----|----|----|----|----|---|---|
| Harjumaa      | 9  | 0  | 1  | 2  | 3  | 1  | 0  | 2 | 0 |
| Ida-Virumaa   | 9  | 1  | 6  | 1  | 1  | 0  | 0  | 0 | 0 |
| Jõgevamaa     | 10 | 0  | 0  | 1  | 4  | 3  | 0  | 2 | 0 |
| Järvamaa      | 1  | 0  | 0  | 1  | 0  | 0  | 0  | 0 | 0 |
| Läänemaa      | 7  | 1  | 0  | 0  | 3  | 1  | 1  | 1 | 0 |
| Lääne-Virumaa | 23 | 4  | 3  | 10 | 1  | 2  | 3  | 0 | 0 |
| Põlvamaa      | 10 | 0  | 2  | 2  | 1  | 3  | 1  | 1 | 0 |
| Pärnumaa      | 2  | 0  | 0  | 1  | 1  | 0  | 0  | 0 | 0 |
| Raplamaa      | 5  | 0  | 0  | 0  | 0  | 0  | 5  | 0 | 0 |
| Tartumaa      | 4  | 0  | 0  | 0  | 0  | 1  | 1  | 2 | 0 |
| Valgamaa      | 1  | 1  | 0  | 0  | 0  | 0  | 0  | 0 | 0 |
| Viljandimaa   | 4  | 0  | 0  | 1  | 2  | 0  | 0  | 1 | 0 |
| Võrumaa       | 2  | 0  | 0  | 1  | 1  | 0  | 0  | 0 | 0 |
| Unknown       | 3  | 3  | 0  | 0  | 0  | 0  | 0  | 0 | 0 |
| Total         | 90 | 10 | 12 | 20 | 17 | 11 | 11 | 9 | 0 |

## Badgers

## Sex

|      |   |   |   |   |   |   |   |   |   |
|------|---|---|---|---|---|---|---|---|---|
| Male | 1 | 0 | 0 | 0 | 0 | 0 | 0 | 1 | 0 |
|------|---|---|---|---|---|---|---|---|---|

|        |   |   |   |   |   |   |   |   |   |
|--------|---|---|---|---|---|---|---|---|---|
| Female | 1 | 0 | 0 | 0 | 0 | 0 | 0 | 0 | 1 |
|--------|---|---|---|---|---|---|---|---|---|

|         |   |   |   |   |   |   |   |   |   |
|---------|---|---|---|---|---|---|---|---|---|
| Unknown | 3 | 0 | 1 | 0 | 0 | 0 | 0 | 1 | 1 |
|---------|---|---|---|---|---|---|---|---|---|

## County

|           |   |   |   |   |   |   |   |   |   |
|-----------|---|---|---|---|---|---|---|---|---|
| Jõgevamaa | 1 | 0 | 1 | 0 | 0 | 0 | 0 | 0 | 0 |
|-----------|---|---|---|---|---|---|---|---|---|

|          |   |   |   |   |   |   |   |   |   |
|----------|---|---|---|---|---|---|---|---|---|
| Järvamaa | 1 | 0 | 0 | 0 | 0 | 0 | 0 | 0 | 1 |
|----------|---|---|---|---|---|---|---|---|---|

|               |   |   |   |   |   |   |   |   |   |
|---------------|---|---|---|---|---|---|---|---|---|
| Lääne-Virumaa | 1 | 0 | 0 | 0 | 0 | 0 | 0 | 1 | 0 |
|---------------|---|---|---|---|---|---|---|---|---|

|          |   |   |   |   |   |   |   |   |   |
|----------|---|---|---|---|---|---|---|---|---|
| Pärnumaa | 1 | 0 | 0 | 0 | 0 | 0 | 0 | 0 | 1 |
|----------|---|---|---|---|---|---|---|---|---|

|             |   |   |   |   |   |   |   |   |   |
|-------------|---|---|---|---|---|---|---|---|---|
| Viljandimaa | 1 | 0 | 0 | 0 | 0 | 0 | 0 | 1 | 0 |
|-------------|---|---|---|---|---|---|---|---|---|

|       |   |   |   |   |   |   |   |   |   |
|-------|---|---|---|---|---|---|---|---|---|
| Total | 5 | 0 | 1 | 0 | 0 | 0 | 0 | 2 | 2 |
|-------|---|---|---|---|---|---|---|---|---|

|               |        |      |      |      |      |      |      |      |      |
|---------------|--------|------|------|------|------|------|------|------|------|
| Animals total | 31,090 | 2478 | 2821 | 4451 | 3679 | 2788 | 4071 | 4768 | 6034 |
|---------------|--------|------|------|------|------|------|------|------|------|

**Table 2.** Prevalence of *Trichinella* infection in wild boars (*Sus scrofa*), brown bears (*Ursus arctos*), Eurasian lynxes (*Lynx lynx*) and badgers (*Meles meles*) hunted in Estonia, 2007–2014, by county. Univariable odds to test positive in comparison to the reference county (Harjumaa), and larval burden data and the *Trichinella* species identified are summarized.

| County             | N tested <sup>a</sup> | n pos <sup>a</sup><br>(n pos <sup>a,b</sup> ) | Prevalence<br>(95% CI) <sup>a</sup> | Odds ratio<br>(95% CI) <sup>a</sup> | p-value <sup>a</sup> | Median lpg <sup>a</sup><br><sup>b</sup> | Mean<br>lpg <sup>a,b</sup> | Range<br>lpg <sup>a,b</sup> | <i>Trichinella</i> species identified<br>(n animals) <sup>a,b</sup> |
|--------------------|-----------------------|-----------------------------------------------|-------------------------------------|-------------------------------------|----------------------|-----------------------------------------|----------------------------|-----------------------------|---------------------------------------------------------------------|
| <i>Wild boars</i>  |                       |                                               |                                     |                                     |                      |                                         |                            |                             |                                                                     |
| Harjumaa           | 2554                  | 51 (52)                                       | 2.0 (1.5–2.6)                       | reference                           | -                    | 1.64                                    | 23.45                      | 0.02–654.50                 | Tb (44), Tn (2), Tb+Tn (1), Tb+Ts (2), Tspp (3)                     |
| Hiiumaa            | 304                   | 8 (8)                                         | 2.6 (1.2–4.9)                       | 1.3 (0.6–2.7)                       | 0.454                | 3.60                                    | 14.68                      | 0.02–55.50                  | Tb (7), Tspp (1)                                                    |
| Ida-Virumaa        | 473                   | 9 (11)                                        | 1.9 (0.9–3.5)                       | 0.95 (0.4–1.9)                      | 0.924                | 1.90                                    | 12.61                      | 0.02–100.00                 | Tb (4), Tn (2), Tspp (5)                                            |
| Jõgevamaa          | 1078                  | 12 (12)                                       | 1.1 (0.6–1.9)                       | 0.55 (0.3–1.0)                      | 0.057                | 0.59                                    | 5.21                       | 0.02–45.20                  | Tb (4), Tn (4), Tb+Tn (1), Tspp (3)                                 |
| Järvamaa           | 1038                  | 13 (13)                                       | 1.3 (0.7–2.1)                       | 0.6 (0.3–1.1)                       | 0.123                | 1.88                                    | 13.88                      | 0.02–101.08                 | Tb (10), Tn (1), Tspp (2)                                           |
| Läänemaa           | 1995                  | 42 (42)                                       | 2.1 (1.5–2.8)                       | 1.1 (0.7–1.6)                       | 0.796                | 0.83                                    | 10.10                      | 0.02–191.36                 | Tb (37), Tn (1), Ts (1), Tspp (3)                                   |
| Lääne-Virumaa      | 2698                  | 25 (25)                                       | 0.9 (0.6–1.3)                       | 0.5 (0.3–0.7)                       | 0.001 ***            | 0.76                                    | 14.32                      | 0.02–230.88                 | Tb (18), Tn (2), Tspp (5)                                           |
| Põlvamaa           | 1349                  | 4 (4)                                         | 0.3 (0.1–0.7)                       | 0.1 (0.04–0.4)                      | <0.001 ***           | 7.80                                    | 8.22                       | 0.20–17.06                  | Tb (2), Ts (1), Tspp (1)                                            |
| Pärnumaa           | 1156                  | 27 (30)                                       | 2.3 (1.6–3.3)                       | 1.2 (0.7–1.9)                       | 0.504                | 1.34                                    | 8.62                       | 0.01–100.00                 | Tb (23), Tn (2), Tp (1), Tb+Tn (2), Tspp (2)                        |
| Raplamaa           | 1237                  | 21 (21)                                       | 1.7 (1.1–2.5)                       | 0.8 (0.5–1.4)                       | 0.536                | 7.60                                    | 12.99                      | 0.02–53.42                  | Tb (14), Ts (1), Tb+Ts (1), Tspp (5)                                |
| Saaremaa           | 2438                  | 45 (53)                                       | 1.8 (1.4–2.4)                       | 0.9 (0.6–1.4)                       | 0.700                | 5.43                                    | 19.06                      | 0.04–190.00                 | Tb (36), Tp (5), Ts (1), Tspp (12)                                  |
| Tartumaa           | 1060                  | 9 (9)                                         | 0.8 (0.4–1.6)                       | 0.4 (0.2–0.8)                       | 0.010 **             | 0.14                                    | 7.24                       | 0.02–54.32                  | Tb (6), Tn (1), Tb+Tn (1)                                           |
| Valgamaa           | 256                   | 3 (3)                                         | 1.2 (0.3–3.2)                       | 0.6 (0.1–1.7)                       | 0.378                | 0.10                                    | 0.52                       | 0.08–1.38                   | Tb (2), Tspp (1)                                                    |
| Viljandimaa        | 370                   | 2 (2)                                         | 0.5 (0.1–1.8)                       | 0.3 (0.04–0.9)                      | 0.034 *              | 5.05                                    | 5.05                       | 4.76–5.34                   | Tb (1), Ts (1)                                                      |
| Võrumaa            | 497                   | 1 (2)                                         | 0.2 (0.01–1.0)                      | 0.1 (0.0–0.5)                       | 0.001 ***            | 5.68                                    | 5.68                       | 5.36–6.00                   | Tb (1), Tspp (1)                                                    |
| Unknown            | 12,063                | 9 (9)                                         | 0.1 (0.04–0.1)                      |                                     |                      | 1.73 <sup>c</sup>                       | 3.25 <sup>c</sup>          | 0.06–12.54 <sup>c</sup>     | Tb (6), Tspp (3)                                                    |
| <i>Brown bears</i> |                       |                                               |                                     |                                     |                      |                                         |                            |                             |                                                                     |
| Harjumaa           | 31                    | 7 (7)                                         | 22.6 (10.6–39.6)                    | reference                           | -                    | 0.86                                    | 2.17                       | 0.02–7.00                   | Tb (3), Tn (2), Tb+Tn (2)                                           |
| Ida-Virumaa        | 72                    | 12 (12)                                       | 16.7 (9.4–26.6)                     | 0.7 (0.2–2.1)                       | 0.488                | 0.78                                    | 3.15                       | 0.03–16.34                  | Tb (4), Tn (2), Tspp (6)                                            |

|               |    |         |                    |                |        |                   |                   |                         |                                                |
|---------------|----|---------|--------------------|----------------|--------|-------------------|-------------------|-------------------------|------------------------------------------------|
| Jõgevamaa     | 61 | 6 (6)   | 9.8 (4.1–19.3)     | 0.4 (0.1–1.3)  | 0.118  | 0.17              | 1.22              | 0.04–6.00               | Tb (4), Tn (2)                                 |
| Järvamaa      | 37 | 10 (10) | 27.0 (14.6–42.9)   | 1.3 (0.4–4.0)  | 0.688  | 0.46              | 1.65              | 0.06–8.36               | Tb (4), Tn (5), Tspp (1)                       |
| Läänemaa      | 2  | 2 (2)   | 100.0 (22.4–100.0) | 3.3 (0.3–36.5) | 0.312  | 5.39              | 5.39              | 0.02–10.76              | Tb (2)                                         |
| Lääne-Virumaa | 75 | 13 (13) | 17.3 (10.0–27.2)   | 0.7 (0.3–2.1)  | 0.536  | 0.84              | 5.32              | 0.08–28.96              | Tb (4), Tn (8), Tspp (1)                       |
| Põlvamaa      | 14 | 1 (1)   | 7.1 (0.4–30.5)     | 0.3 (0.0–1.9)  | 0.212  | 0.14              | 0.14              | 0.14                    | Tb (1)                                         |
| Pärnumaa      | 14 | 2 (2)   | 14.3 (2.5–39.7)    | 0.5 (0.1–2.6)  | 0.446  | 0.31              | 0.31              | 0.02–0.60               | Tb (1), Tb+Tn (1)                              |
| Raplamaa      | 18 | 0 (0)   | 0.0 (0.0–15.3)     | 0.0 (0.0–0.8)  | 0.031* | -                 | -                 | -                       | -                                              |
| Tartumaa      | 44 | 6 (6)   | 13.6 (5.7–26.2)    | 0.5 (0.15–1.9) | 0.336  | 0.16              | 16.39             | 0.06–81.96              | Tb (3), Tn (1), Tspp (2)                       |
| Viljandimaa   | 7  | 0 (1)   | 0.0 (0.0–34.8)     | 0.0 (0.0–2.3)  | 0.208  | 0.07              | 0.07              | 0.02–0.13               | Tb (1), Tn (1)                                 |
| Võrumaa       | 1  | 0 (0)   | 0.0 (0.0–95.0)     | 0.0 (0.0–67.9) | 0.781  | -                 | -                 | -                       | -                                              |
| Unknown       | 53 | 3 (3)   | 5.7 (1.5–14.6)     |                |        | 0.76              | 1.11              | 0.2–2.36                | Tb (2), Tn (1)                                 |
| Lynxes        |    |         |                    |                |        |                   |                   |                         |                                                |
| Harjumaa      | 9  | 7 (7)   | 77.8 (43.8–96.1)   | reference      | -      | 0.82              | 4.34              | 0.38–14.88              | Tb (3), Tn (1), Ts (1), Tb+Tn (2)              |
| Ida-Virumaa   | 9  | 6 (6)   | 66.7 (33.2–90.7)   | 0.6 (0.1–5.3)  | 0.647  | 0.60 <sup>c</sup> | 0.68 <sup>c</sup> | 0.24–1.30 <sup>c</sup>  | Tb (4), Tspp (2)                               |
| Jõgevamaa     | 10 | 5 (5)   | 50.0 (21.2–78.8)   | 0.3 (0.0–2.3)  | 0.260  | 2.48              | 2.44              | 0.02–4.26               | Tb (2), Tn (1), Tb+Tn (2)                      |
| Järvamaa      | 1  | 1 (2)   | 100.0 (5.0–100.0)  | -              | 0.800  | 3.73              | 3.73              | 3.60–3.86               | Ts (1), Tspp (1)                               |
| Läänemaa      | 7  | 5 (5)   | 71.4 (33.0–94.9)   | 0.7 (0.1–9.1)  | 0.800  | 4.82              | 3.65              | 0.20–6.24               | Tb (3), Tn (1), Tspp (1)                       |
| Lääne-Virumaa | 23 | 17 (17) | 73.9 (53.4–88.7)   | 0.8 (0.1–5.0)  | 0.858  | 0.84 <sup>c</sup> | 2.66 <sup>c</sup> | 0.16–21.40 <sup>c</sup> | Tb (6), Tn (1), Tb+Tn (2), Tb+Ts (1), Tspp (8) |
| Põlvamaa      | 10 | 4 (4)   | 40.0 (14.2–70.9)   | 0.2 (0.0–1.5)  | 0.130  | 1.24              | 3.13              | 0.04–10.00              | Tb (1), Tb+Tn (3)                              |
| Pärnumaa      | 2  | 2 (4)   | 100.0 (22.4–100.0) | -              | 0.655  | 0.41              | 0.73              | 0.10–2.00               | Tb (1), Ts (1), Tb+Tn (2)                      |
| Raplamaa      | 5  | 5 (5)   | 100.0 (54.9–100.0) | -              | 0.396  | 17.4              | 16.55             | 2.34–28.00              | Tb (2), Tn (1), Tb+Tn (2)                      |

|                |   |       |                    |                |       |       |       |            |                           |
|----------------|---|-------|--------------------|----------------|-------|-------|-------|------------|---------------------------|
| Tartumaa       | 4 | 2 (2) | 50.0 (9.4–90.6)    | 0.3 (0.0–4.7)  | 0.406 | 8.94  | 8.94  | 4.72–13.16 | Tb (1), Tb+Tn (1)         |
| Valgamaa       | 1 | 0 (1) | 0.0 (0.0–95.0)     | 0.0 (0.0–8.1)  | 0.300 | 0.54  | 0.54  | 0.54       | Tb (1)                    |
| Viljandimaa    | 4 | 4 (4) | 100.0 (47.3–100.0) | –              | 0.462 | 6.42  | 6.98  | 0.46–14.60 | Tb (2), Ts (1), Tb+Tn (1) |
| Võrumaa        | 2 | 1 (1) | 50.0 (2.5–97.5)    | 0.3 (0.0–16.5) | 0.546 | 2.96  | 2.96  | 2.96       | Tb (1)                    |
| Unknown        | 3 | 0 (0) | 0.0 (0.0–63.2)     | –              | –     | –     | –     | –          | –                         |
| <i>Badgers</i> |   |       |                    |                |       |       |       |            |                           |
| Jõgevamaa      | 1 | 1     | 100.0 (5.0–100.0)  | –              | –     | 2.90  | 2.90  | 2.90       | Tspp (1)                  |
| Järvamaa       | 1 | 0     | 0.0 (0.0–95.0)     | –              | –     | –     | –     | –          | –                         |
| Lääne-Virumaa  | 1 | 1     | 100.0 (5.0–100.0)  | –              | –     | 11.28 | 11.28 | 11.28      | Tb (1)                    |
| Pärnumaa       | 1 | 0     | 0.0 (0.0–95.0)     | –              | –     | –     | –     | –          | –                         |
| Viljandimaa    | 1 | 1     | 100.0 (5.0–100.0)  | –              | –     | 20.96 | 20.96 | 20.96      | Tb (1)                    |

<sup>a</sup> Animals tested as primary testing; <sup>b</sup> Positive animals tested for confirmatory purposes.; <sup>c</sup>No data on larval burden for one wild boar and two lynxes. 95% CI: 95% confidence interval, Mid-P Exact; n pos: number of *Trichinella* positive animals; lpg: number of *Trichinella* larvae per gram of muscle tissue; *p*-value: two-tailed Mid-P Exact: \*  $p \leq 0.05$ ; \*\*  $p \leq 0.01$ ; \*\*\*  $p \leq 0.001$ ; Tb: *Trichinella britovi*; Tn: *Trichinella nativa*; Tp: *Trichinella pseudospiralis*; Ts: *Trichinella spiralis*; Tb+Tn: mixed infection with *Trichinella britovi* and *Trichinella nativa*; Tb+Ts: mixed infection with *Trichinella britovi* and *Trichinella spiralis*; Tspp: *Trichinella* species, no species-level result.
